# Supplementary material for: Weight Change and Risk of Atherosclerosis Measured by Carotid Intima–Media Thickness (cIMT) from a Prospective Cohort—Analysis of the First-Wave Follow-Up Data of the Canadian Longitudinal Study on Aging (CLSA)
Source: MDPI journal article supplement (doi:10.3390/jcdd10100435), 2023-10-19

Supplementary Figure S1. Unadjusted mean levels of cIMT (mm) by weight change quartile at the follow-up.

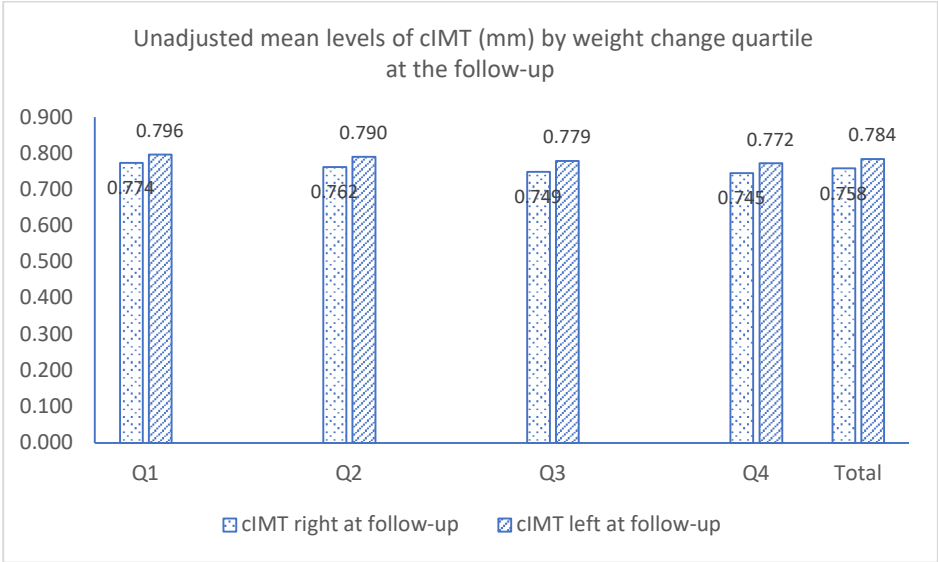

Supplementary Figure S2. Age and sex adjusted mean levels of cIMT (mm) by quartile of weight change at the follow-up.

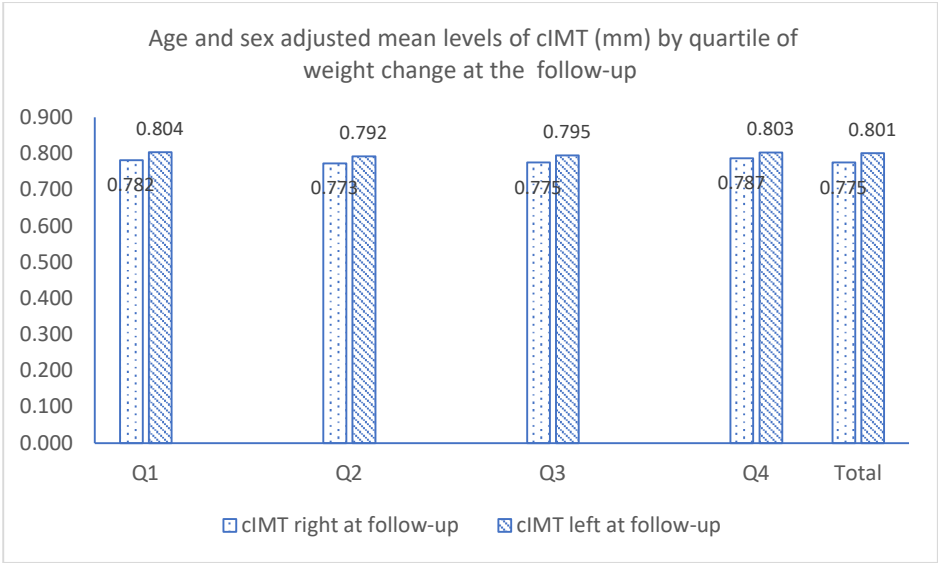

Supplement: s1 [file s1]
